# Supplementary material
Source: PubMed Central journal article supplement (PMC4576983)
Supplement: embr0016-1145-sd2.pdf [file embr0016-1145-sd2.pdf]

Manuscript EMBOR-2015-40759

**Mitophagy defects arising from BNip3 loss promote mammary tumor progression to metastasis.**

Aparajita H. Chourasia, Kristin Tracy, Casey Frankenberger, Michelle L. Boland, Marina N. Sharifi, Lauren E. Drake, Joseph R. Sachleben, John M. Asara, Jason W. Locasale, Gregory S. Karczmar and Kay F. Macleod

*Corresponding author: Kay F. Macleod, University of Chicago*

---

**Review timeline:**

Submission date:  
Accepted:

29 May 2015  
09 July 2015

---

**Transaction Report:**

No Peer Review Process File is available with this article, as the authors have chosen not to make the review process public in this case.
